# Supplementary material for: Reconstruction of the Evolutionary Histories of UGT Gene Superfamily in Legumes Clarifies the Functional Divergence of Duplicates in Specialized Metabolism
Source: MDPI journal article supplement (doi:10.3390/ijms21051855), 2020-03-08
Supplement: s1 [file s1]

Supplementary Text 1. List of UGTs used to create Figure 1

Notes: Full-length protein sequences are used for the construction of Figure 1. See Table S6 for POL assignment and species information

| No. | POL No. | UGT Ids                                                       | No. | POL No. | UGT Ids                                  |
|-----|---------|---------------------------------------------------------------|-----|---------|------------------------------------------|
| 1   | A01     | Medtr1g090270.1; Glyma.10G194000                              | 50  | E13     | Medtr0078s0190.1; Glyma.08G338100        |
| 2   | A02     | Medtr2g008220.1; Glyma.08G181000                              | 51  | E14     | Medtr7g117170.1; Glyma.03G256500         |
| 3   | A03     | Medtr2g008226.1; Glyma.15G051400                              | 52  | E15     | Medtr8g006260.1; Glyma.07G110300         |
| 4   | A04     | Medtr2g014900.1; Glyma.08G332500                              | 53  | E16     | Medtr8g006270.1; Glyma.03G116100         |
| 5   | A05     | Medtr2g083380.1; Glyma.13G254700                              | 54  | E17     | Medtr0184s0030.1; Glyma.08G367000        |
| 6   | A06     | Medtr2g083420.1; Glyma.12G212600                              | 55  | E18     | Medtr8g074550.1; Glyma.12G163400         |
| 7   | A07     | Medtr4g079270.1; Glyma.06G285700                              | 56  | E19     | Glyma.03G032800; Lj0g3v0128059.1         |
| 8   | A08     | Medtr8g007565.1; Glyma.07G067200                              | 57  | E20     | Glyma.05G181100; Lj5g3v0780820.1         |
| 9   | A09     | Medtr7g067330.1; Phvul.010G037600.1                           | 58  | E21     | Glyma.09G128300; Ca_21871                |
| 10  | A10     | Medtr8g068340.1; Glyma.18G148200                              | 59  | E22     | Glyma.09G128400; C.cajan_08626           |
| 11  | A11     | Glyma.06G235000; Lj3g3v0428930.1                              | 60  | E23     | Tp57577 TGAC v2 mRNA40423; C.cajan_28637 |
| 12  | A12     | Phvul.011G136400.1; Vradi0377s00040.1                         | 61  | F01     | Medtr4g128690.1; Glyma.13G094300         |
| 13  | B01     | Medtr2g059240.1; Glyma.06G206700                              | 62  | F02     | Glyma.07G183400; Phvul.002G214500.1      |
| 14  | B02     | Medtr0009s0240.1; Glyma.01G067100                             | 63  | F03     | Glyma.13G255800; Lj6g3v2192300.1         |
| 15  | B03     | Medtr8g466240.1; Glyma.14G054400                              | 64  | G01     | Medtr2g008210.1; Glyma.15G051300         |
| 16  | C01     | Phvul.008G151900.1; Vradi04g04260                             | 65  | G02     | Medtr6g014050.1; Glyma.19G035800         |
| 17  | D01     | Medtr1g040310.1; Glyma.15G221300                              | 66  | G03     | Medtr3g079480.1; Glyma.13G029500         |
| 18  | D02     | Medtr5g045970.1; Glyma.10G062300                              | 67  | G04     | Medtr4g094220.1; Aradu.598J8.1           |
| 19  | D03     | Medtr4g117950.1; Glyma.07G254700                              | 68  | G05     | Medtr5g464760.1; Glyma.14G175100         |
| 20  | D04     | Medtr4g024020.1; Glyma.03G187500                              | 69  | H01     | Medtr3g069690.1; Phvul.001G238800.1      |
| 21  | D05     | Medtr4g031800.1; Glyma.16G033700                              | 70  | H02     | Medtr3g069710.1; Glyma.11G225600         |
| 22  | D06     | Medtr7g070940.1; Glyma.09G280400                              | 71  | H03     | Medtr4g064987.1; Glyma.11G134300         |
| 23  | D07     | Medtr8g066610.1; Glyma.02G105000                              | 72  | I01     | Medtr7g013180.1; Glyma.18G265700         |
| 24  | D08     | Medtr4g485630.1; Glyma.02G104600                              | 73  | I02     | Medtr7g013240.1; Glyma.08G244800         |
| 25  | D09     | Medtr5g016660.1; Glyma.11G053400                              | 74  | I03     | Glyma.01G085600; Aradu.177E7.1           |
| 26  | D10     | Medtr5g040030.1; Glyma.01G046300                              | 75  | I04     | Glyma.19G029300; Aradu.JG94E.1           |
| 27  | D11     | Medtr5g045960.1; Glyma.19G187700                              | 76  | J01     | Medtr3g031400.1; Glyma.11G164600         |
| 28  | D12     | Medtr7g117405.1; Glyma.03G186900                              | 77  | J02     | Medtr5g072830.1; Glyma.14G198000         |
| 29  | D13     | Medtr7g102550.1; Glyma.19G187500                              | 78  | J03     | Medtr5g075440.1; Glyma.02G230900         |
| 30  | D14     | Medtr7g102560.1; Glyma.03G187700                              | 79  | J04     | Medtr5g072860.1; Glyma.02G231000         |
| 31  | D15     | Glyma.01G188800; Lup001002.1                                  | 80  | J05     | Glyma.04G188100; Ca_08995                |
| 32  | D16     | Glyma.02G104300; Lj4g3v0620410.1                              | 81  | L01     | Medtr1g032490.1; Glyma.20G128100         |
| 33  | D17     | Glyma.10G062200; Lj5g3v0681080.1                              | 82  | L02     | Medtr1g107380.1; Glyma.10G262700         |
| 34  | D18     | Glyma.08G348500; Phvul.008G130100.2                           | 83  | L03     | Medtr8g083290.1; Glyma.05G150600         |
| 35  | D19     | Glyma.11G000500; Lj1g3v0116690.1                              | 84  | L04     | Medtr4g094920.1; Glyma.17G166500         |
| 36  | D20     | Lj5g3v0681090.1; Aradu.GH7AM.1                                | 85  | L05     | Medtr5g004940.1; C.cajan_29587           |
| 37  | D21     | Tp57577 TGAC v2 mRNA6677; GenBank: GAU45636.1_T. subterraneum | 86  | L06     | Medtr5g035560.1; Glyma.01G036000         |
| 38  | E01     | Medtr1g019510.1; Glyma.03G104500                              | 87  | L07     | Medtr6g038300.1; Glyma.16G158100         |
| 39  | E02     | Medtr2g046750.1; Glyma.09G082900                              | 88  | L08     | Medtr7g080935.1; Glyma.18G247000         |
| 40  | E03     | Medtr3g009510.1; Glyma.06G320800                              | 89  | L09     | Medtr8g088560.1; Glyma.08G125600         |
| 41  | E04     | Medtr4g082820.1; Tp57577 TGAC v2 mRNA41332                    | 90  | L10     | Phvul.011G184600.1; Vradi0371s00010.1    |
| 42  | E05     | Medtr5g019580.2; Glyma.01G177900                              | 91  | M01     | Medtr2g098430.1; Glyma.15G032000         |
| 43  | E06     | Medtr5g070040.1; Glyma.14G192800                              | 92  | M02     | Medtr5g087620.1; Glyma.14G043700         |
| 44  | E07     | Medtr5g090660.1; Glyma.02G309800                              | 93  | N01     | Medtr5g098960.1; Glyma.14G002500         |
| 45  | E08     | Medtr6g005600.1; Glyma.07G110500                              | 94  | O01     | Medtr1g029540.1; Glyma.02G184200         |
| 46  | E09     | Medtr8g465670.1; Glyma.03G116200                              | 95  | O02     | Medtr8g090095.1; Glyma.03G134500         |
| 47  | E10     | Medtr6g033615.1; Glyma.16G175300                              | 96  | P01     | Medtr5g031830.1; Glyma.01G022300         |
| 48  | E11     | Medtr6g078320.1; Glyma.16G212000                              | 97  | P02     | Glyma.04G109000; Phvul.010G001300.1      |
| 49  | E12     | Medtr7g046490.1; Glyma.01G074600                              | 98  | R01     | Medtr5g027210.1; Phvul.002G132100.1      |
